# Supplementary material
Source: Royal Society of Chemistry journal article supplement (doi:10.1039/d6gc01072e)
Supplement: d6gc01072e1.pdf [file d6gc01072e1.pdf]

**Tab. S1** Contents of oxides and fluorine elements in de-lithium material powder.

| Molecular formula | P <sub>2</sub> O <sub>5</sub> | Fe <sub>2</sub> O <sub>3</sub> | F    | Other |
|-------------------|-------------------------------|--------------------------------|------|-------|
| Content(wt%)      | 52.63                         | 44.62                          | 2.18 | 0.57  |

**Tab. S2** The cost and profit to dispose of 1 kg spent LiFePO<sub>4</sub> cathode power.

|             | Chemical                                                        | Price        | Dosage     | Total   |
|-------------|-----------------------------------------------------------------|--------------|------------|---------|
| Consumption | SLFP                                                            | 2.48 \$/kg   | 1.00 kg    | 2.48 \$ |
|             | C <sub>6</sub> H <sub>8</sub> O <sub>7</sub> ·H <sub>2</sub> O  | 0.74 \$/kg   | 2.33 kg    | 1.72 \$ |
|             | MgO                                                             | 0.41 \$/kg   | 0.17 kg    | 0.07 \$ |
|             | C <sub>6</sub> H <sub>12</sub> O <sub>6</sub> ·H <sub>2</sub> O | 0.42 \$/kg   | 0.24 kg    | 0.10 \$ |
|             | Na <sub>2</sub> CO <sub>3</sub>                                 | 0.63 \$/kg   | 0.35 kg    | 0.22 \$ |
|             | Electricity                                                     | 0.09 \$/kw·h | 17.21 kw·h | 1.55 \$ |
| Total       | 6.14 \$                                                         |              |            |         |
|             | Chemical                                                        | Price        | Dosage     | Total   |
| Product     | LiFePO <sub>4</sub>                                             | 9.39 \$/ kg  | 0.86 kg    | 8.08 \$ |
|             | Al                                                              | 2.22 \$/ kg  | 0.09 kg    | 0.20 \$ |
| Total       | 8.28 \$                                                         |              |            |         |
| Profit      | 2.14 \$                                                         |              |            |         |

As shown in Tab. S2, the total cost and profit of the lab-scale recycling process were calculated in detail based on 1.0 kg of spent LiFePO<sub>4</sub> cathode sheets. It is estimated that treating 1.0 kg of spent LiFePO<sub>4</sub> cathode sheets can yield 0.86 kg of regenerated LiFePO<sub>4</sub> and 0.09 kg of aluminum foil. Consequently, the profit from recycling 1.0 kg of spent LiFePO<sub>4</sub> cathode sheets is \$2.14.
